# Supplementary material for: Synthetic Peptide Purification via Solid-Phase Extraction with Gradient Elution: A Simple, Economical, Fast, and Efficient Methodology
Source: Molecules. 2019 Mar 28;24(7):1215. doi: 10.3390/molecules24071215 (PMC6479624; doi:10.3390/molecules24071215)
Supplement: Supplementary file 1 [file molecules-24-01215-s001.pdf]

# Synthetic Peptide Purification via Solid-Phase Extraction with Gradient Elution: A Simple, Economical, Fast, and Efficient Methodology

Diego Sebastián Insuasty Cepeda <sup>1</sup>, Héctor Manuel Pineda Castañeda <sup>1</sup>,  
Andrea Verónica Rodríguez Mayor <sup>1</sup>, Javier Eduardo García Castañeda <sup>2</sup>,  
Mauricio Maldonado Villamil <sup>1</sup>, Ricardo Fierro Medina <sup>1</sup> and Zuly Jenny Rivera Monroy <sup>1,\*</sup>

\* Correspondence: zjriveram@unal.edu.co; Tel.: +57-1-3165000 (ext. 14436)

Herein an example of peptide purification via RP-SPE and gradient elution is shown

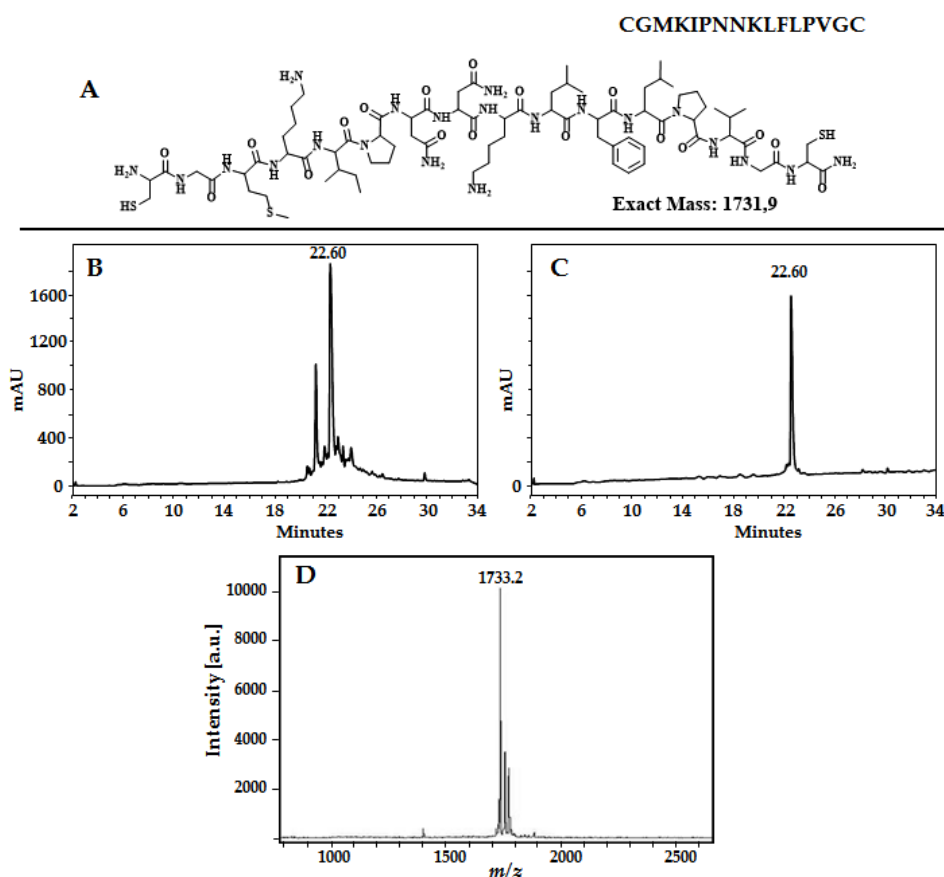

**Figure S1.** Purification of a peptide containing seventeen amino acids. Sequence and structure (A), chromatographic profile of crude (B) and purified (C) product. For signal at tr: 22.60 min, the percentage of peak area is 45% (B) and 85% (C). Calculated %B<sub>e</sub>, for target peak, was 21.6% B, the purest fraction contained 23% B. Purification yield was 13%. MALDI-TOF spectrum of purified peptide (D); it is observed a signal at  $m/z$  1733.2 corresponding to the  $[M + H]^+$  specie. Fractions collected were analyzed by RP-HPLC in an Agilent 1200 liquid chromatograph with UV-Vis detector (210 nm). An Eclipse XDB-C18 column (3.5  $\mu$ m; 4.6  $\times$  150 mm,  $t_0$  = 2.2 min) was used, using elution gradient of 5/5/50/100/100/5/5% solvent B (TFA 0.05% in ACN) in 0/2/47/49/55/55.1/70 min, a flow rate of 1.0 mL/min,  $t_D$  1.8 min. 10  $\mu$ L of sample solution (1 mg/mL) were injected.
